# Supplementary material
Source: HighWire-hosted journal article supplement (https://bmjopen.bmj.com/content/14/9/e081632)
Supplement: inline-supplementary-material-1 [file inline-supplementary-material-1.pdf]

Supplemental Table S1

| <b>Databas<br/>e</b> | <b>Key terms related to 'Urban<br/>Green Spaces') AND</b>                                                                                                                                                                                                                                            | <b>Key terms 'Heat-related<br/>Morbidity and Mortality'</b>                                                                                                                                                                                                                         | <b>Combined Keywords</b>                                                                                                                                                                                                                                                                                                                                                                                                                                                                                                                                                                         |
|----------------------|------------------------------------------------------------------------------------------------------------------------------------------------------------------------------------------------------------------------------------------------------------------------------------------------------|-------------------------------------------------------------------------------------------------------------------------------------------------------------------------------------------------------------------------------------------------------------------------------------|--------------------------------------------------------------------------------------------------------------------------------------------------------------------------------------------------------------------------------------------------------------------------------------------------------------------------------------------------------------------------------------------------------------------------------------------------------------------------------------------------------------------------------------------------------------------------------------------------|
| Pubmed               | ("Urban Green Space"[Title/Abstract] OR "Urban Greenery"[Title/Abstract] OR "Urban Vegetation"[Title/Abstract] OR "Urban Trees"[Title/Abstract] OR "Urban Parks"[Title/Abstract] OR "Urban Green Zones"[Title/Abstract] OR "Green Roofs"[Title/Abstract] OR "Green Infrastructure"[Title/Abstract ]) | ("Heat-related Mortality"[Title/Abstract] OR "Heat-related Morbidity"[Title/Abstract ] OR "Heat Stress"[Title/Abstract] OR "Heat Illness"[Title/Abstract] OR "Heat Stroke"[Title/Abstract] OR "Heat Exhaustion"[Title/Abstract] OR "Heat-related Health Outcomes"[Title/Abstract ]) | ("Urban Green Space"[Title/Abstract] OR "Urban Greenery"[Title/Abstract] OR "Urban Vegetation"[Title/Abstract] OR "Urban Trees"[Title/Abstract] OR "Urban Parks"[Title/Abstract] OR "Urban Green Zones"[Title/Abstract] OR "Green Roofs"[Title/Abstract] OR "Green Infrastructure"[Title/Abstract ] ) AND ( ("Heat-related Mortality"[Title/Abstract] OR "Heat-related Morbidity"[Title/Abstract] OR "Heat Stress"[Title/Abstract] OR "Heat Illness"[Title/Abstract] OR "Heat Stroke"[Title/Abstract] OR "Heat Exhaustion"[Title/Abstract] OR "Heat-related Health Outcomes"[Title/Abstract] ) ) |
| Scopus               | "Urban Green Space" OR "Urban Greenery" OR "Urban Vegetation" OR "Urban Trees" OR "Urban Parks" OR "Urban Green Zones" OR "Green Roofs" OR "Green Infrastructure"                                                                                                                                    | "Heat-related Mortality" OR "Heat-related Morbidity" OR "Heat Stress" OR "Heat Illness" OR "Heat Stroke" OR "Heat Exhaustion" OR "Heat-related Health Outcomes"                                                                                                                     | "Urban Green Space" OR "Urban Greenery" OR "Urban Vegetation" OR "Urban Trees" OR "Urban Parks" OR "Urban Green Zones" OR "Green Roofs" OR "Green Infrastructure" AND "Heat-related Mortality" OR "Heat-related Morbidity" OR "Heat Stress" OR "Heat Illness" OR "Heat Stroke" OR "Heat Exhaustion" OR "Heat-related Health Outcomes"                                                                                                                                                                                                                                                            |
| Google Scholar       | ("Urban Green Space" OR "Urban Greenery" OR "Urban Vegetation" OR "Urban Trees" OR "Urban Parks" OR "Urban Green Zones" OR                                                                                                                                                                           | ("Heat-related Mortality" OR "Heat-related Morbidity")                                                                                                                                                                                                                              | ("Urban Green Space" OR "Urban Greenery" OR "Urban Vegetation" OR "Urban Trees" OR "Urban Parks" OR "Urban Green Zones" OR                                                                                                                                                                                                                                                                                                                                                                                                                                                                       |

|  |                                          |  |                                                                                                     |
|--|------------------------------------------|--|-----------------------------------------------------------------------------------------------------|
|  | "Green Roofs" OR "Green Infrastructure") |  | "Green Roofs" OR "Green Infrastructure") AND ("Heat-related Mortality" OR "Heat-related Morbidity") |
|--|------------------------------------------|--|-----------------------------------------------------------------------------------------------------|
